# Supplementary material for: Calcium Metal Anchoring on Graphitic Carbon Nitride: d-Orbital Effects and Electronic Stabilization - A DFT Investigation
Source: Research Square preprint supplement (doi:10.21203/rs.3.rs-7785788/v1), 2025-10-22
Supplement: Supplementary file 1 [file 74799bd2312c2c420f183443.docx]

**Supplementary material**

**Calcium Metal Anchoring on Graphitic Carbon Nitride: d-Orbital Effects and Electronic Stabilization - A DFT Investigation**

Nithya Devi Ramasamy1, Karthik Krishnasamy2, Thangavel Subramani3,∗

1Basic Engineerng, Government Polytechnic College, Coimbatore, 641014, Tamil Nadu, India

2Department of Chemistry, Nandha Arts and Science College, Erode, 638052, Tamil Nadu, India

3Department of Chemistry, Chikkaiah Government Arts and Science College, Erode, 638004, Tamil Nadu, India


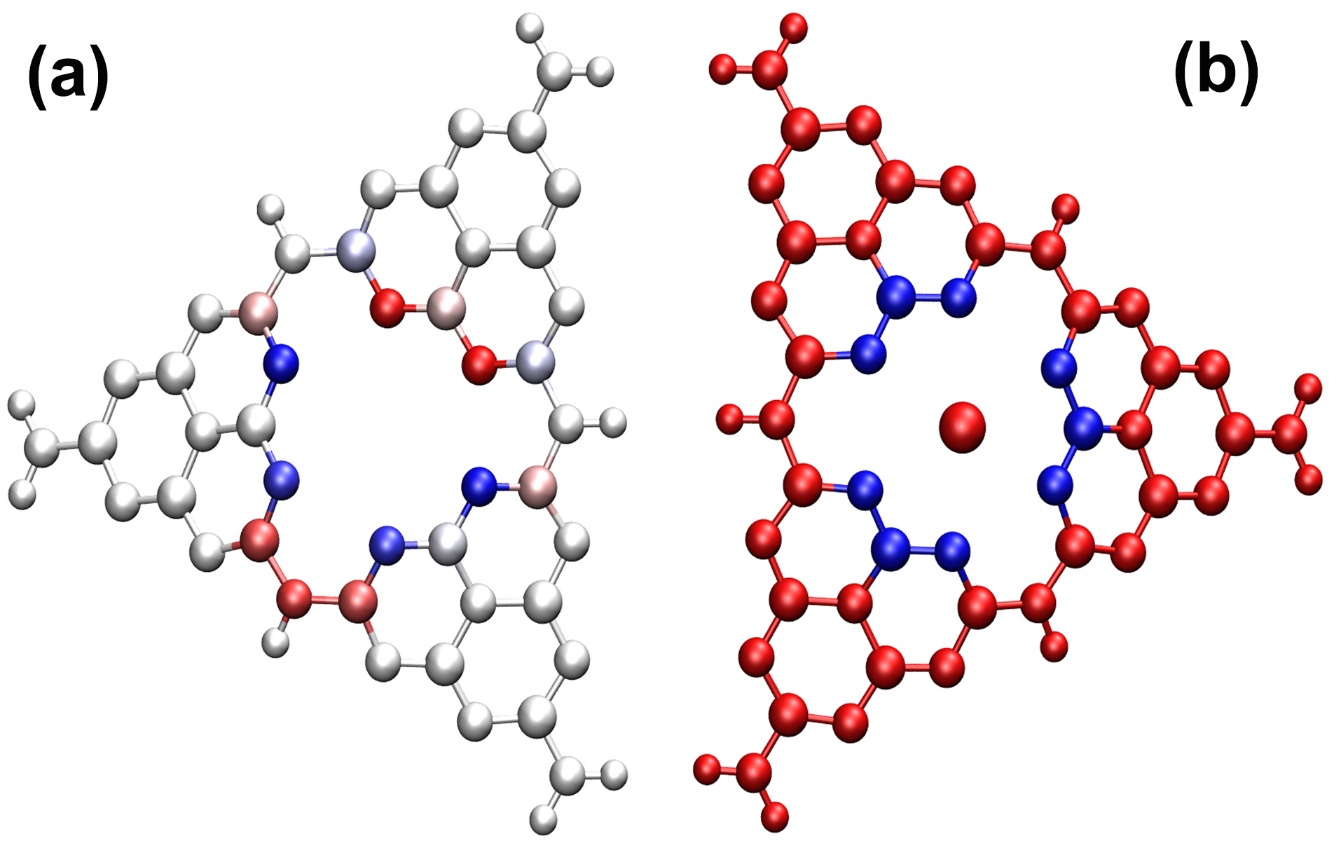


Figure S1: Planar Arrangement of N’s in Nitrogen Ring of (a) g-C3N4 and (b) Ca/g-C3N4.

Table S1: MPP values of g-C3N4 and Ca/g-C3N4.

| Atoms | MPP (Å) | |
| --- | --- | --- |
| g-C3N4 | Ca/g-C3N4 |
| N3 | -0.3535 | 0.2837 |
| N7 | -0.3610 | 0.2217 |
| N16 | 0.3995 | 0.3129 |
| N25 | 0.3298 | 0.3151 |
| N34 | 0.4002 | 0.2760 |
| N38 | 0.3256 | 0.2232 |


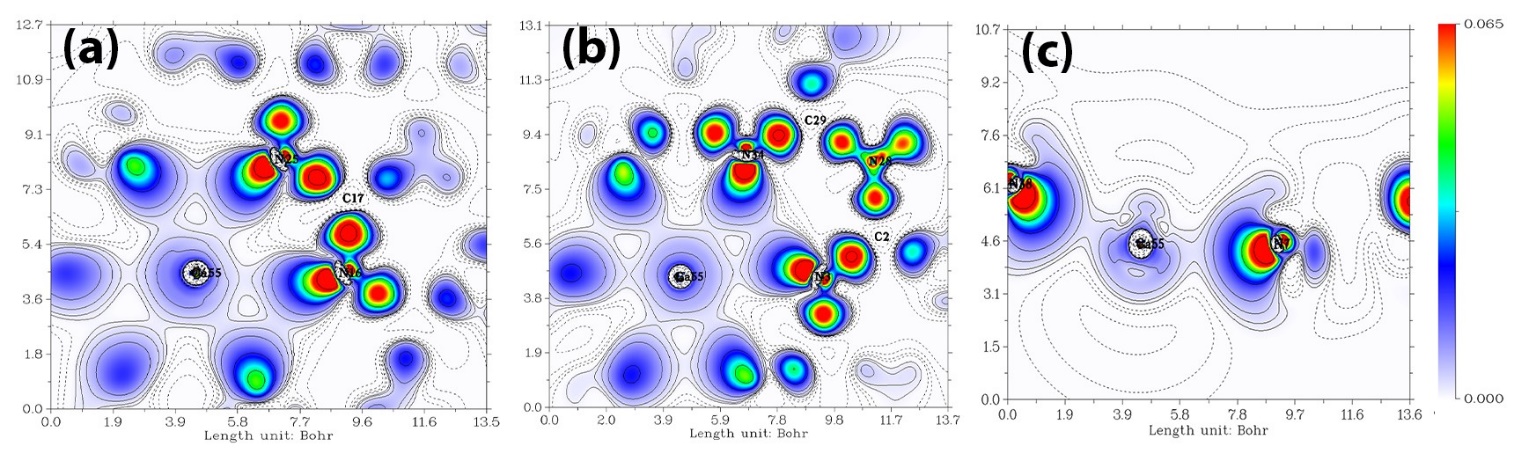


Figure S2: Deformation Electron Density Contour Map of (a) N16-Ca55-N25 (b) N3-Ca55-N34 and (c) N7-Ca55-N38 in Ca/g-C3N4.


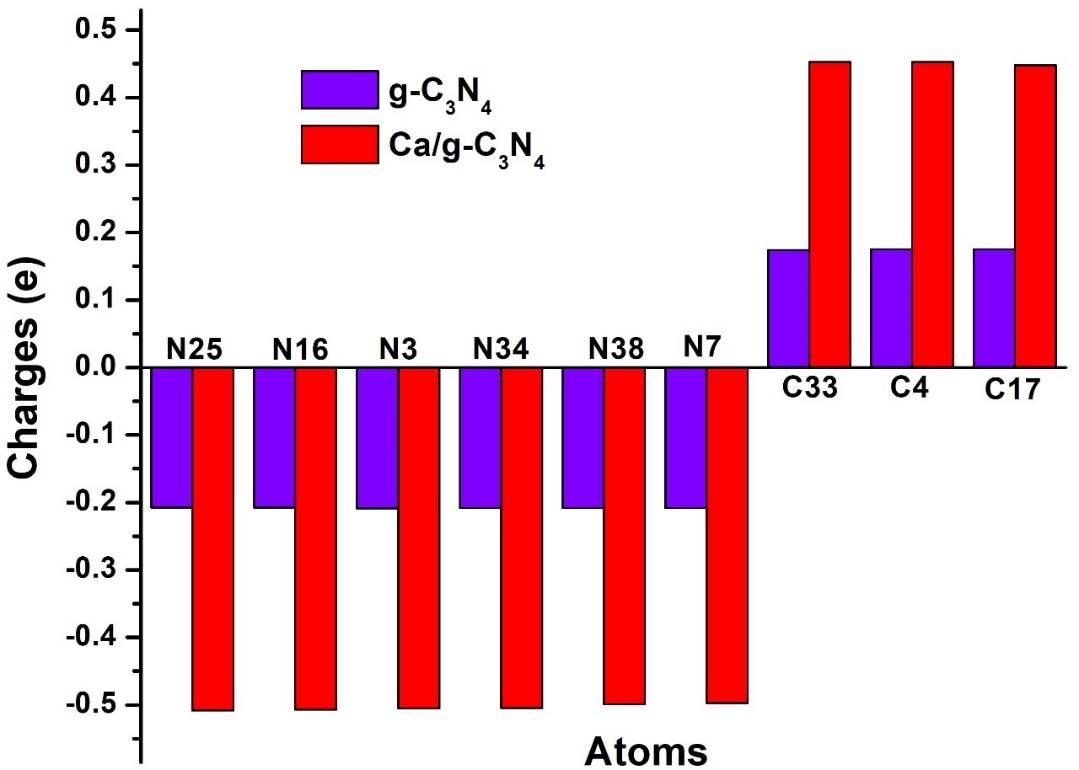


Figure S3: Mulliken Charge Analysis of Selected Atoms in Nitrogen Ring of g-C3N4 and Ca/g-C3N4.

Table S2: Mulliken Charge Analysis of Selected Atoms in Nitrogen Ring of g-C3N4 and Ca/g-C3N4.

| Atoms | Mulliken Charges | |
| --- | --- | --- |
| g-C3N4 | Ca/g-C3N4 |
| N25 | -0.2161 | -0.5081 |
| N16 | -0.2321 | -0.5070 |
| N3 | -0.2468 | -0.5052 |
| N34 | -0.2306 | -0.5044 |
| N38 | -0.2157 | -0.4989 |
| N7 | -0.2453 | -0.4973 |
| C33 | 0.1786 | 0.4526 |
| C4 | 0.1789 | 0.4526 |
| C17 | 0.1776 | 0.4477 |
